# Supplementary material for: Sub-lethal effects of permethrin exposure on a passerine: implications for managing ectoparasites in wild bird nests
Source: PubMed Central journal article supplement (PMC7416766; doi:10.1093/conphys/coaa076), 2020-09-08

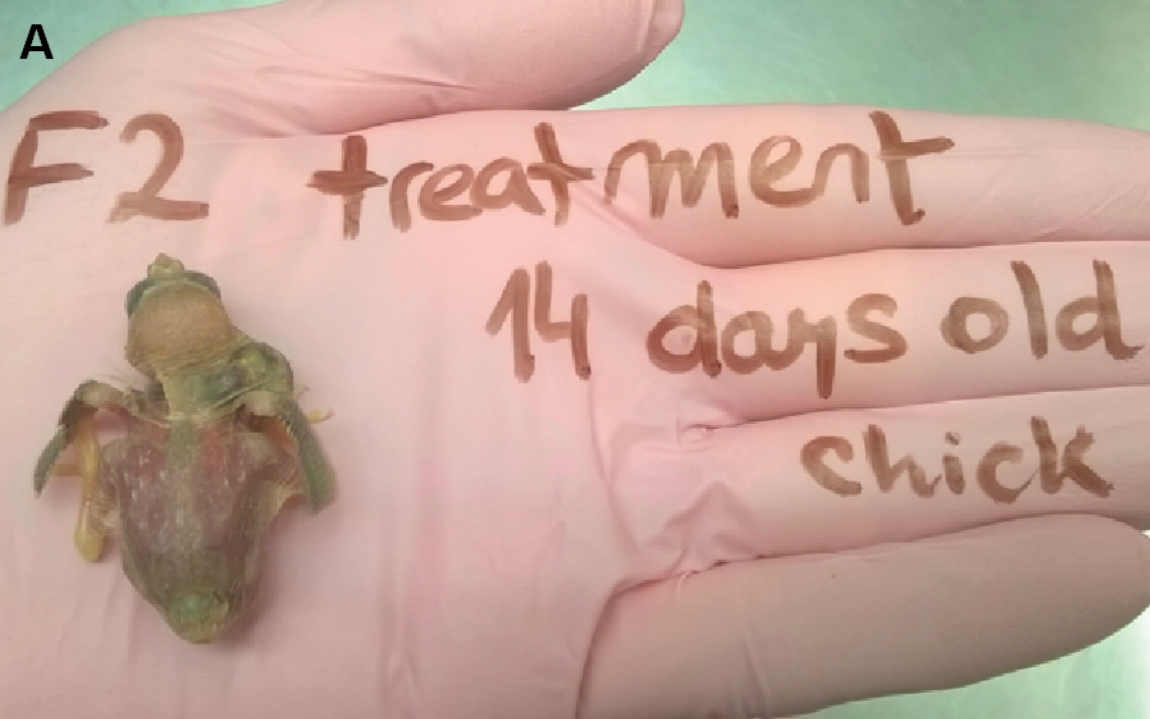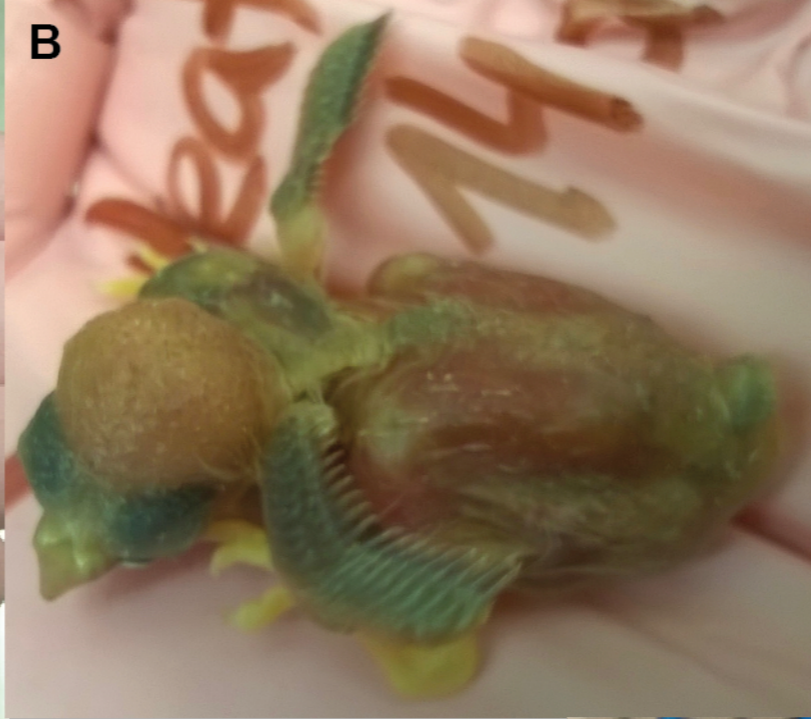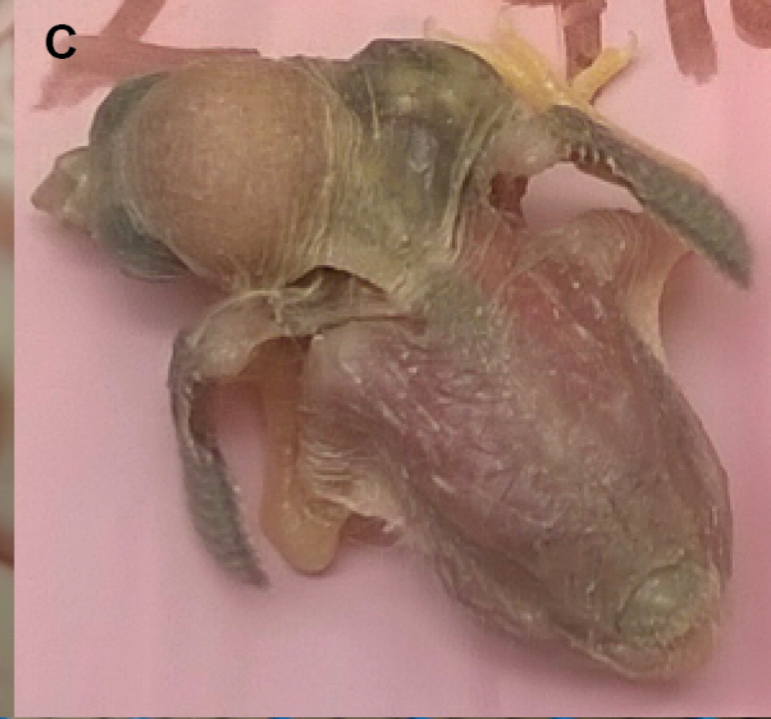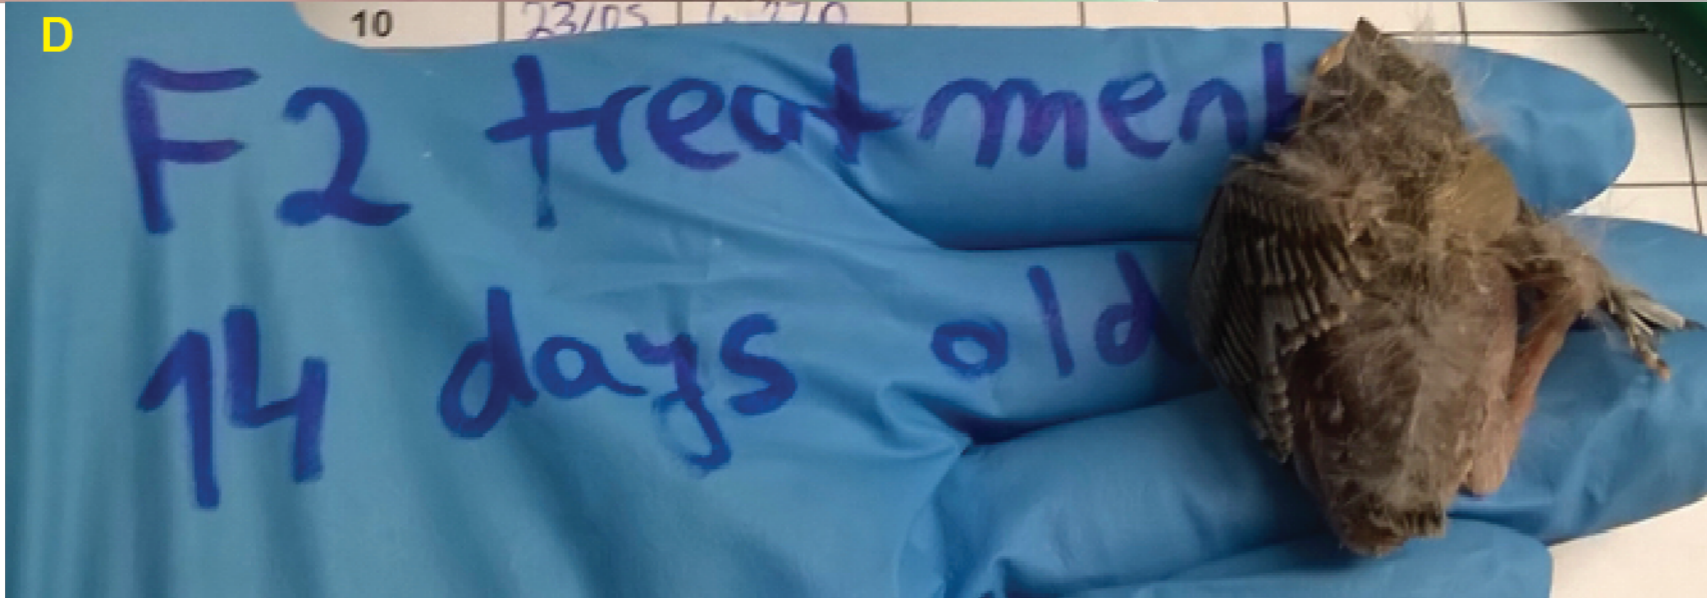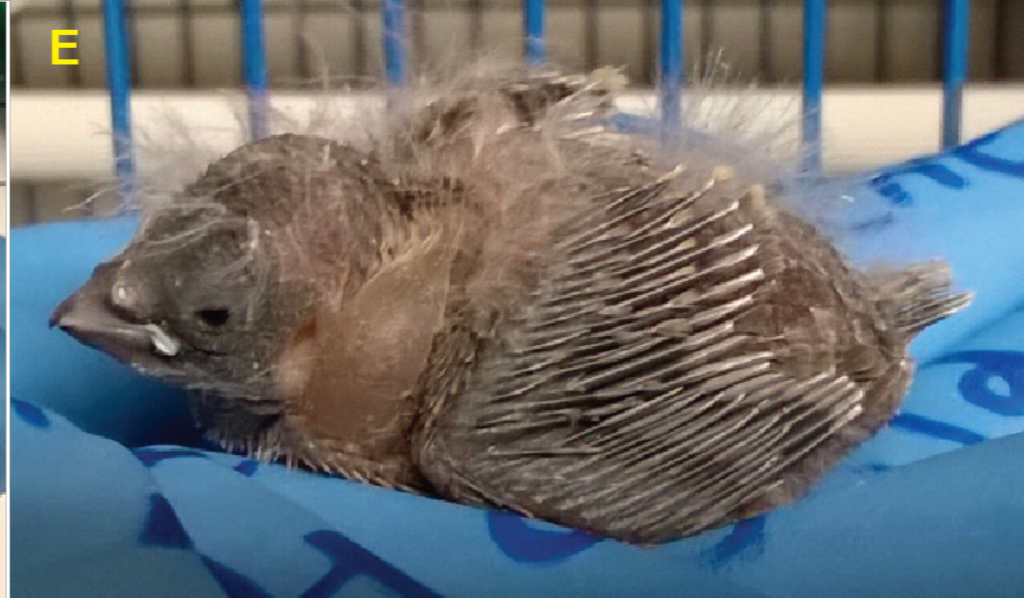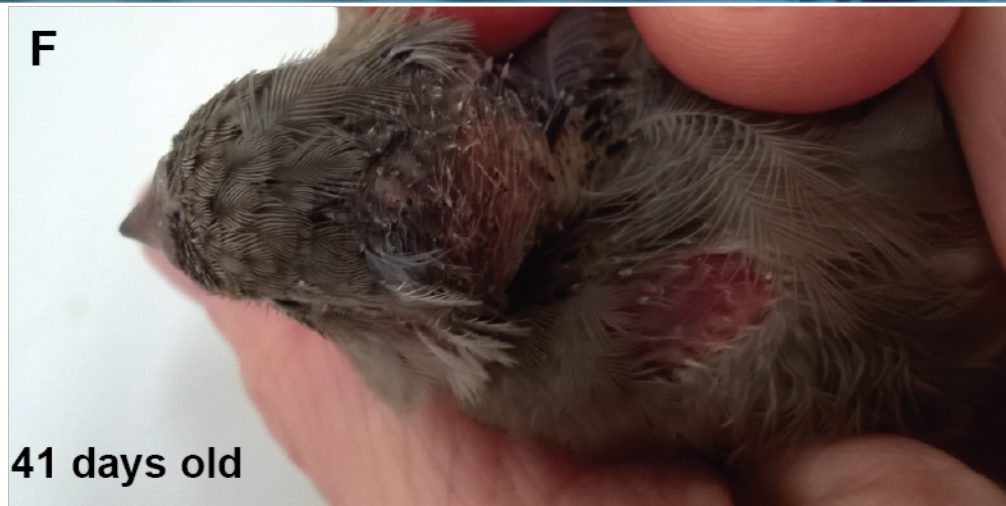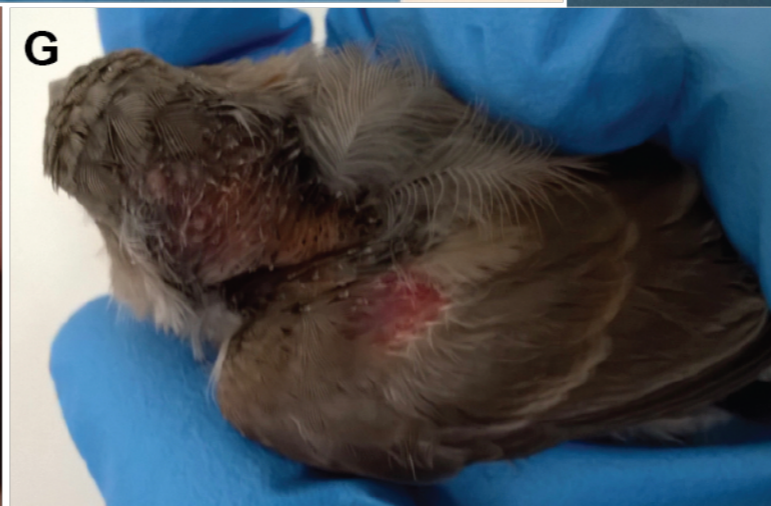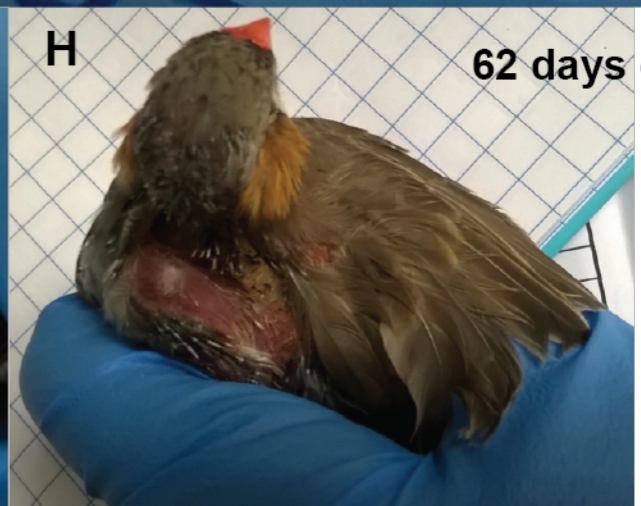

Supplement: suppl-fig1_coaa076.pdf [file suppl-fig1_coaa076.pdf]
